# Supplementary material
Source: PubMed Central journal article supplement (PMC3964050)
Supplement: 1402228111_pnas.201402228SI.pdf [file 1402228111_pnas.201402228SI.pdf]

# Supporting Information

Matlack et al. 10.1073/pnas.1402228111

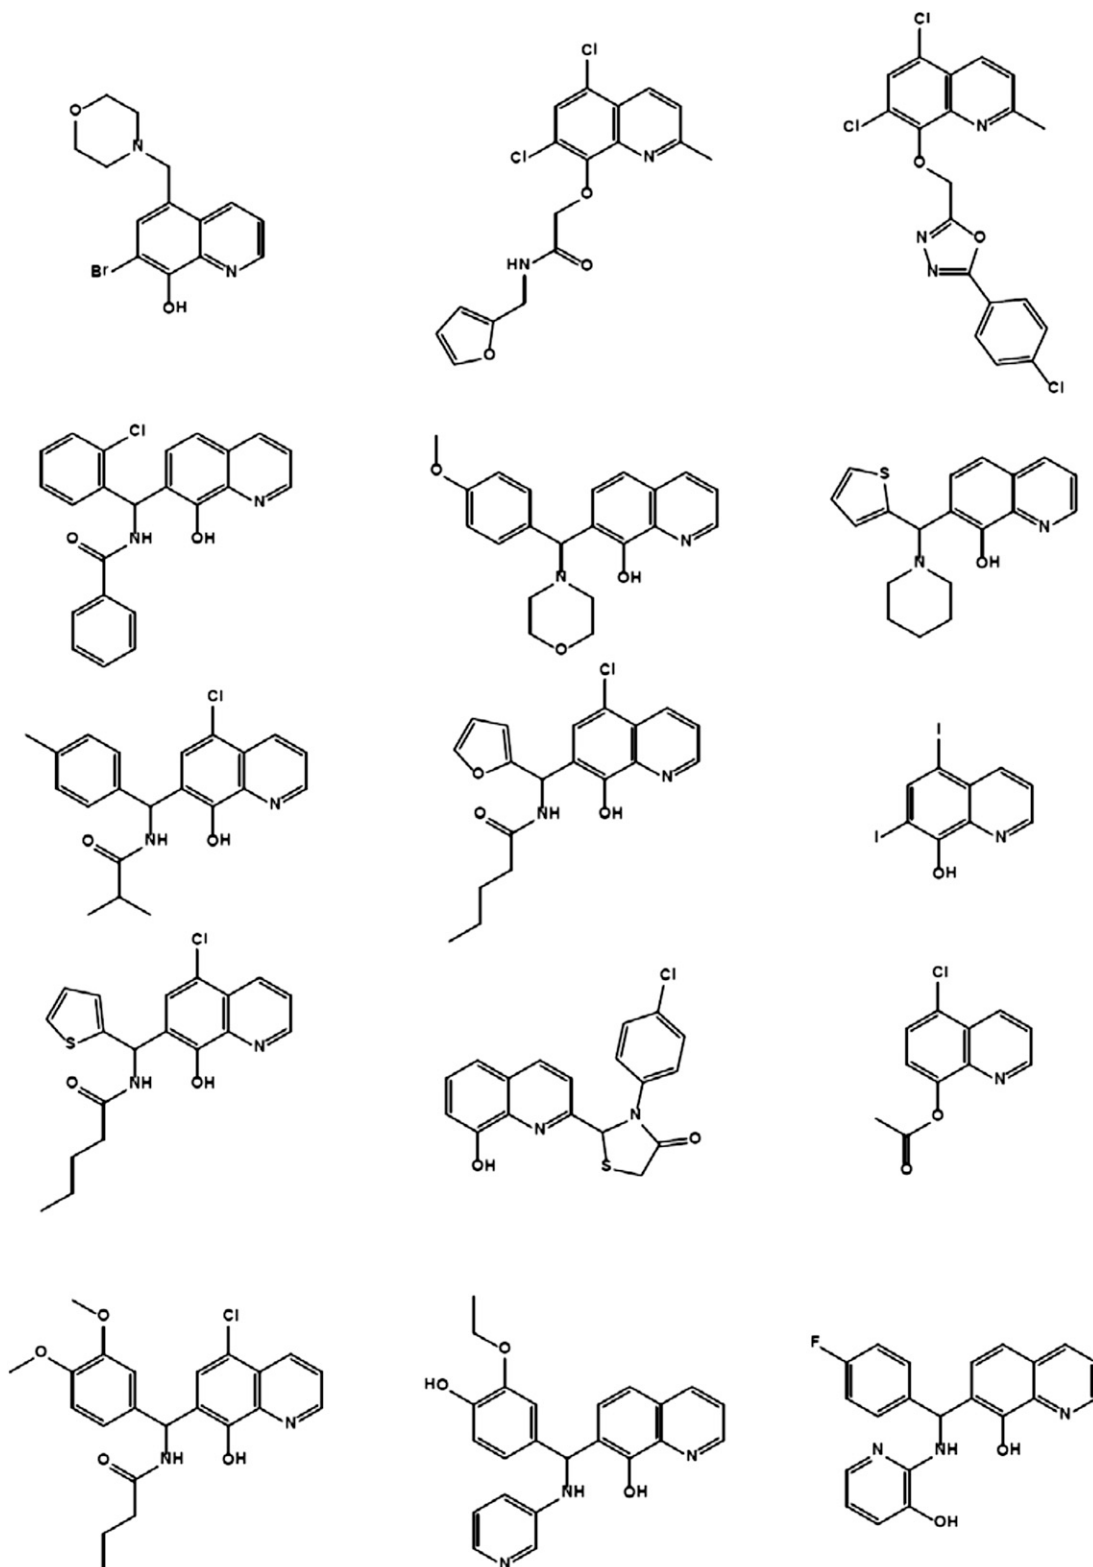

Fig. S1. Structures of 8-hydroxyquinoline (8-OHQ) hits. Fifteen of 30 hits from the initial  $\beta$ -amyloid ( $A\beta$ ) small-molecule screen were 8-OHQs. All compounds had the core 8-OHQ with various, diverse substituents, largely attached through the hydroxyl-containing ring.

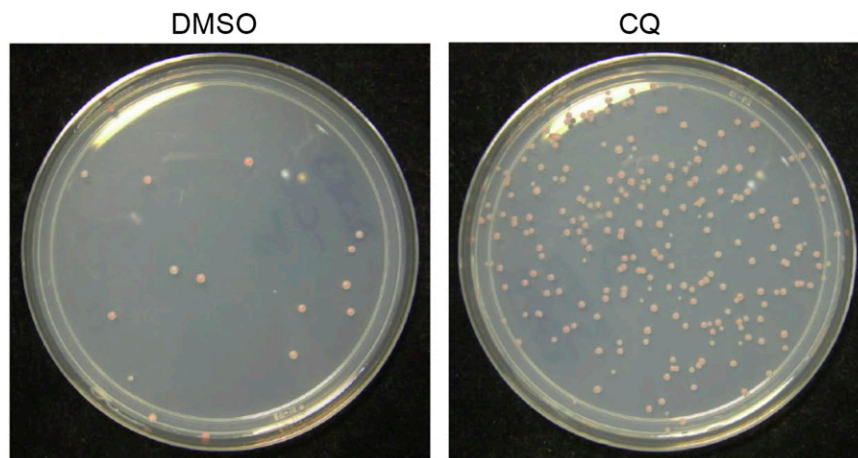

**Fig. 52.** Clioquinol (CQ) increases cell number. To ensure that the increase in  $OD_{600}$  was due to a rescue of toxicity and not due to an artifact of increased cell size, cells were plated to single colony-forming units after CQ treatment. Indeed, there was an increase in the number of viable cells after treating  $A\beta$ -expressing cells with a protective dose of CQ.

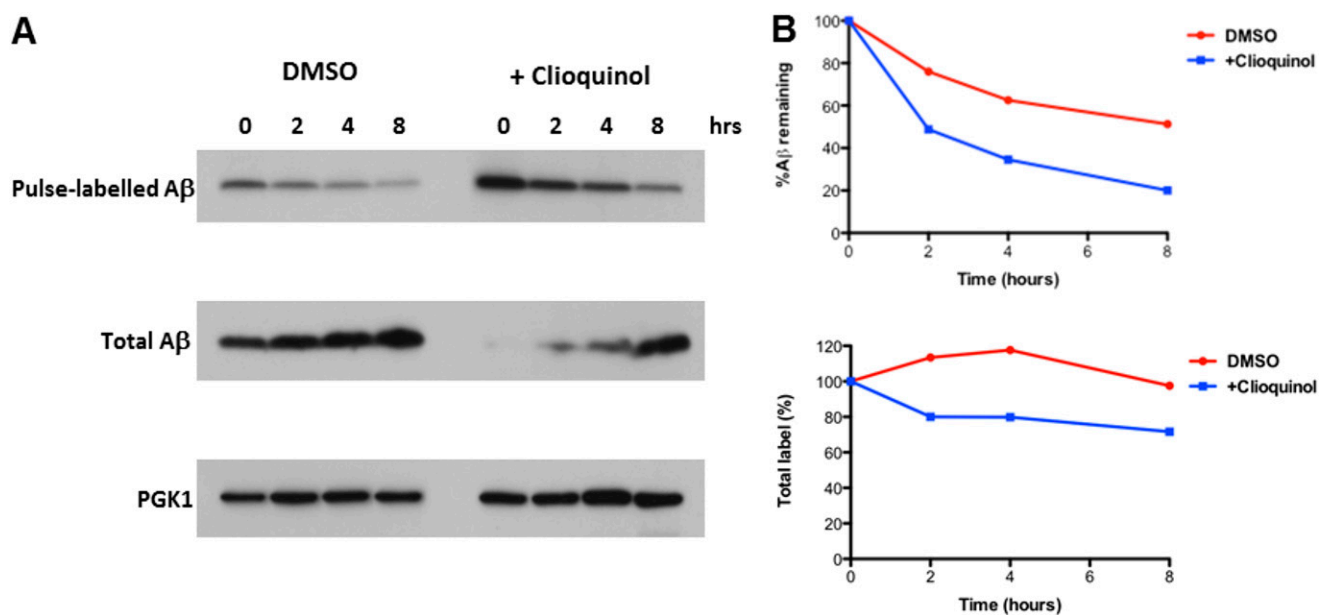

**Fig. 53.**  $^{35}\text{S}$  pulse labeling of  $A\beta$ . (A)  $A\beta$  analysis of pulse-labeling experiment. The top panel shows  $^{35}\text{S}$ -labeled, immunoprecipitated  $A\beta$  over time. The middle shows total  $A\beta$  by immunoblot with the 6E10 antibody. The bottom panel shows levels of control protein, Pgk1. (B) Quantification of  $A\beta$  and total  $^{35}\text{S}$  labeling during degradation time course. The top panel is exact data shown in Fig. 6. The bottom panel shows total label as quantified from an entire lane of protein without immunoprecipitation.



**Table S2. Gene deletions and toxic compound tested for rescue by CQ**

| Yeast gene deletion/drug          | Gene name | Mechanism                                        | Significant rescue by CQ? |
|-----------------------------------|-----------|--------------------------------------------------|---------------------------|
| Systematic yeast name             |           |                                                  |                           |
| YEL046C                           | GLY1      |                                                  | No                        |
| YGL070C                           | RPB9      |                                                  | No                        |
| YCR028C                           | FEN2      |                                                  | No                        |
| YDR463W                           | BAP1      |                                                  | No                        |
| YGR167W                           | CLC1      |                                                  | No                        |
| Drug                              |           |                                                  |                           |
| Trifluoperazine                   |           | H <sup>+</sup> ATPase, K <sup>+</sup> regulation | No                        |
| <i>t</i> -Butyl hydrogen peroxide |           | Oxidant                                          | No                        |
| Rapamycin                         |           | TOR inhibition                                   | Mild                      |
| 4-Nitroquinoline-1-oxide          |           | DNA damage                                       | No                        |
| Cycloheximide                     |           | Translation inhibitor                            | No                        |
| Gliotoxin                         |           | Thioredoxin redox                                | No                        |
| Hydroxyurea                       |           | dNTP depletion                                   | No                        |
